# Supplementary material for: Origin and Evolution of the Sodium -Pumping NADH: Ubiquinone Oxidoreductase
Source: PubMed Central journal article supplement (PMC4014512; doi:10.1371/journal.pone.0096696), 2014-05-08

Figure S6

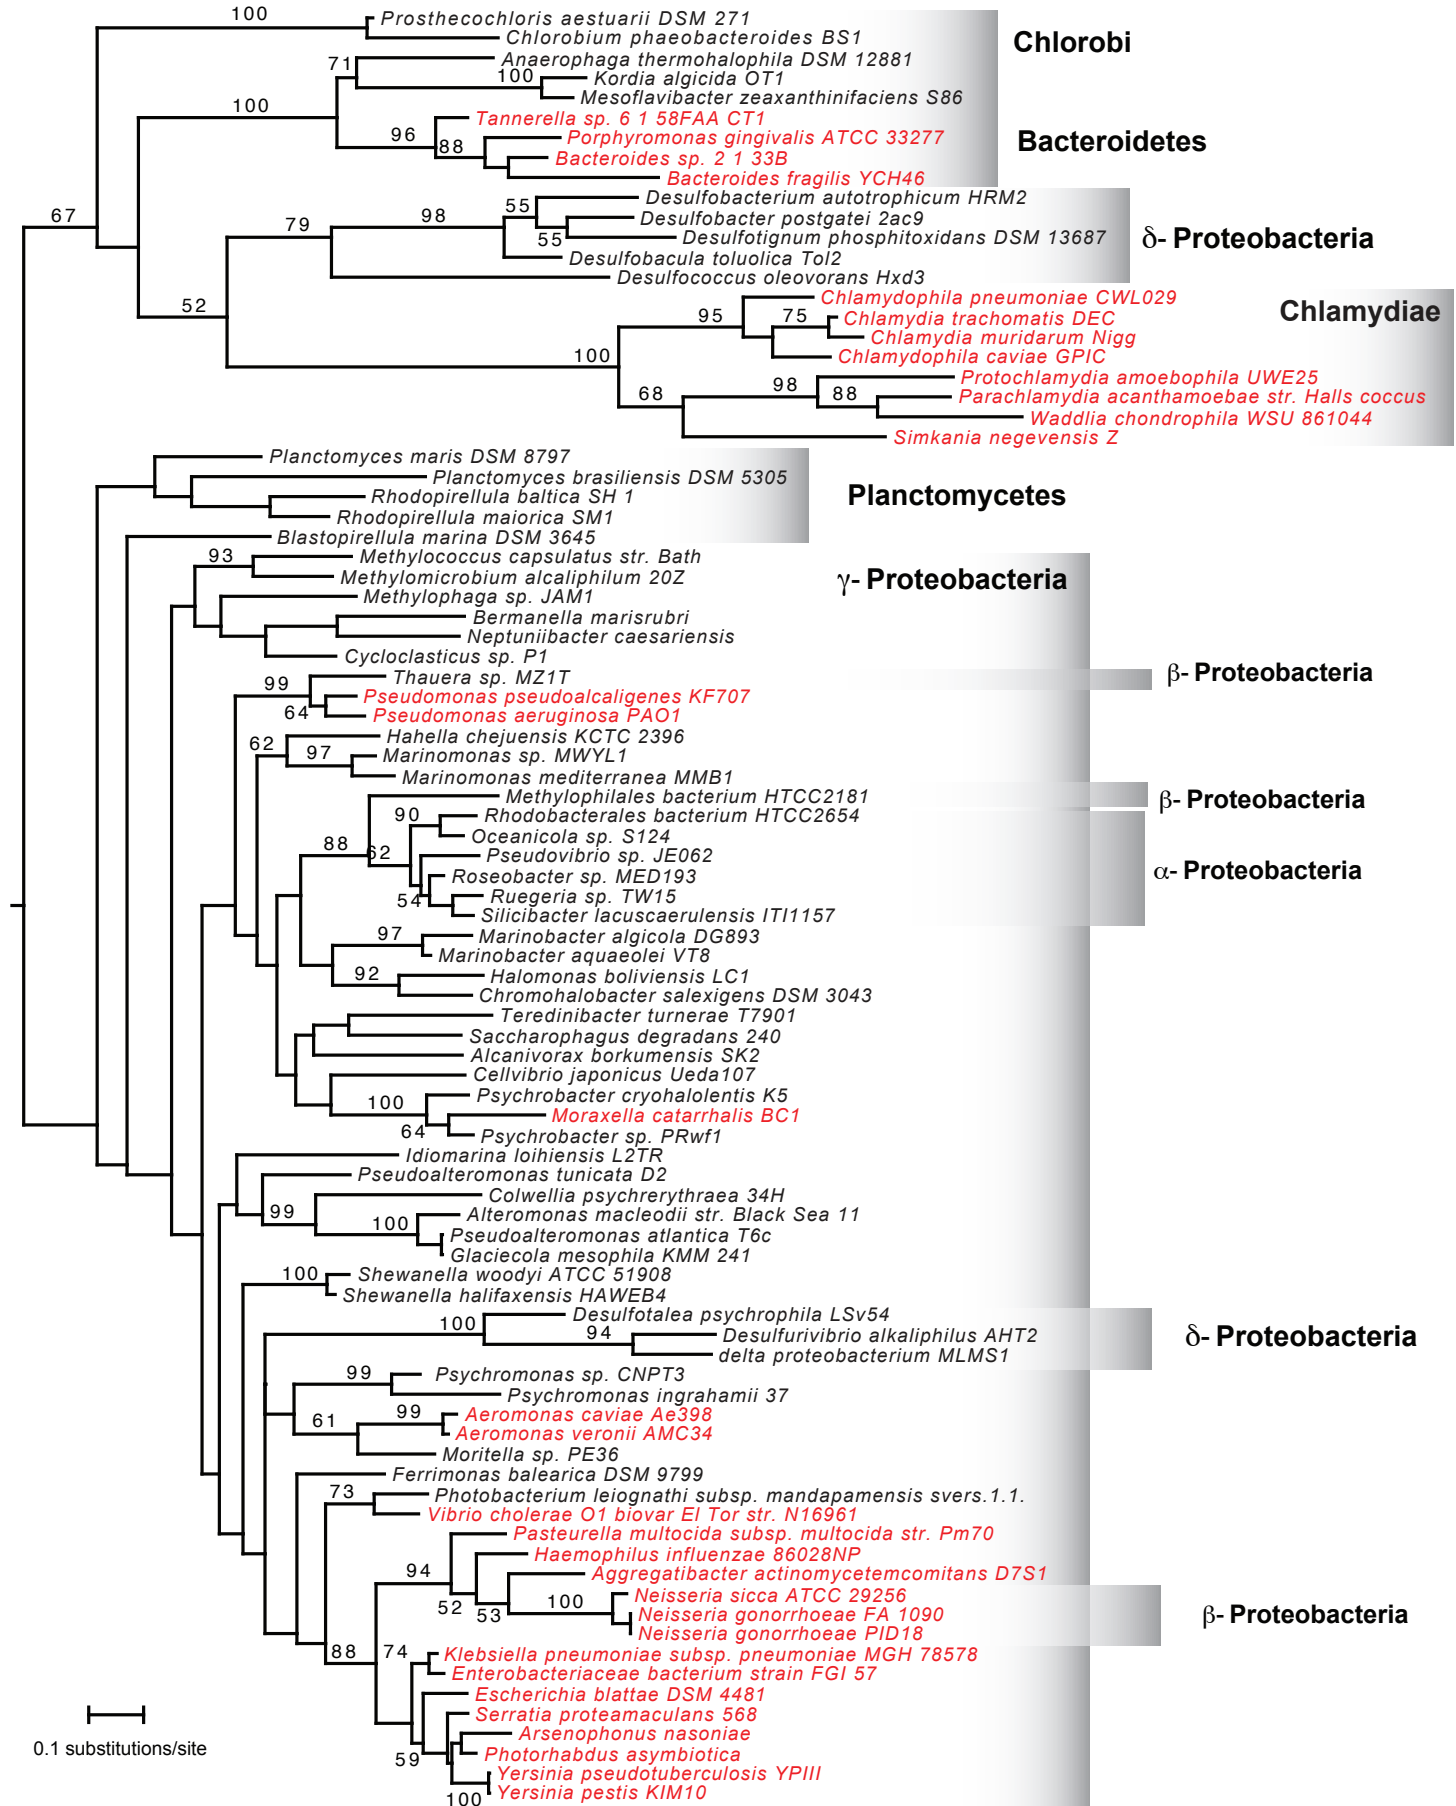

Supplement: pone.0096696.s006.pdf [file pone.0096696.s006.pdf]
