# Supplementary material for: Origin and Evolution of the Sodium -Pumping NADH: Ubiquinone Oxidoreductase
Source: PubMed Central journal article supplement (PMC4014512; doi:10.1371/journal.pone.0096696), 2014-05-08
Supplement: pone.0096696.s010.pdf [file pone.0096696.s010.pdf]

**Supplementary Table S1.** List of the analyzed bacterial taxa harboring Na<sup>+</sup>-NQR complex.

| Group                                                 | Species                                                               | Habitat                | Na <sup>+</sup> -NQR subunits GI numbers (NCBI) |           |           |           |           |           |
|-------------------------------------------------------|-----------------------------------------------------------------------|------------------------|-------------------------------------------------|-----------|-----------|-----------|-----------|-----------|
|                                                       |                                                                       |                        | NqrA                                            | NqrB      | NqrF      | NqrC      | NqrD      | NqrE      |
| α-proteobacteria-Rhodobacterales                      | <i>Pseudovibrio</i> sp. JE062                                         | FL M                   | 254473854                                       | 254473859 | 254473891 | 254473895 | 254473912 | 254473907 |
| α-proteobacteria-Rhodobacterales                      | <i>Maritimibacter alkaliphilus</i> str. HTCC2654                      | FL M                   | 84666304                                        | 84666303  | 84666299  | 84666302  | 84666301  | 84666300  |
| α-proteobacteria-Rhodobacterales                      | <i>Oceanicola</i> sp. S124                                            | FL M                   | 372278659                                       | 372278658 | 372278654 | 372278657 | 372278656 | 372278655 |
| α-proteobacteria-Rhodobacterales                      | <i>Rueseria</i> sp. TW15                                              | FL M                   | 346993341                                       | 346993342 | 346993346 | 346993343 | 346993344 | 346993345 |
| α-proteobacteria-Rhodobacterales                      | <i>Roseobacter</i> sp. MED193                                         | FL M                   | 86138122                                        | 86138121  | 86138117  | 86138120  | 86138119  | 86138118  |
| α-proteobacteria-Rhodobacterales                      | <i>Silicibacter luscuscaerulensis</i> ITI-1157                        | FL non-M Halo          | 260430731                                       | 260430730 | 260430726 | 260430729 | 260430728 | 260430727 |
| β-proteobacteria-Methylotrophiales                    | <i>Methylophilales bacterium</i> HTCC2181                             | FL M                   | 118595098                                       | 118595097 | 118595093 | 118595095 | 118595096 | 118595094 |
| β-proteobacteria-Rhodocyclales                        | <i>Thaera</i> sp. MZ1T                                                | FL non-M               | 217969242                                       | 217969243 | 217969247 | 217969244 | 217969245 | 217969246 |
| β-proteobacteria-Neisseriales                         | <i>Neisseria gonorrhoeae</i> PID18                                    | H Path                 | 268601858                                       | 268601859 | 268601863 | 268601860 | 268601861 | 268601862 |
| β-proteobacteria-Neisseriales                         | <i>Neisseria sicca</i> ATCC 29256                                     | H mic                  | 255065498                                       | 255065499 | 255065503 | 255065500 | 255065501 | 255065502 |
| β-proteobacteria-Neisseriales                         | <i>Neisseria gonorrhoeae</i> FA 1090                                  | H Path                 | 59801757                                        | 59801758  | 59801762  | 59801759  | 59801760  | 59801761  |
| δ-proteobacteria-Desulfobacterales-Desulfobacteraceae | <i>Desulfobacter postgatei</i> Za9                                    | FL M                   | 357036027                                       | 357036026 | 357036022 | 389578491 | 389578492 | 389578493 |
| δ-proteobacteria-Desulfobacterales-Desulfobacteraceae | <i>Desulfobacterium autotrophicum</i> HRM2                            | FL M                   | 224367807                                       | 224367808 | 224367812 | 223690525 | 223690526 | 223690527 |
| δ-proteobacteria-Desulfobacterales-Desulfobacteraceae | <i>Desulfobacula toluolica</i> Tol2                                   | FL M                   | 408420322                                       | 408420321 | 408420317 | 408420320 | 408420318 | 408420319 |
| δ-proteobacteria-Desulfobacterales-Desulfobacteraceae | <i>Desulfotignum phosphitoidans</i> DSM 13687                         | FL M                   | 476533602                                       | 476533603 | 476533607 | 476533604 | 476533605 | 476533606 |
| δ-proteobacteria-Desulfobacterales-Desulfobacteraceae | <i>Desulfococcus oleovorans</i> Hxd3                                  | FL non-M Halo          | 158522547                                       | 158522548 | 158522552 | 158522549 | 158522550 | 158522551 |
| δ-proteobacteria-Desulfobacterales-Desulfobacteraceae | <i>Desulfotolla psychrophila</i> L5v54                                | FL M                   | 51245654                                        | 51245655  | 51245659  | 51245656  | 51245657  | 51245658  |
| δ-proteobacteria-Desulfobacterales-Desulfobulbaceae   | <i>Desulfurivibrio alkalicophilus</i> AHT2                            | FL non-M Halo          | 297568031                                       | 297568032 | 297568036 | 297568033 | 297568034 | 297568035 |
| δ-proteobacteria-unclassified                         | <i>delta proteobacterium</i> MLMS-1                                   | FL non-M               | 94267357                                        | 94267358  | 94264303  | 94267359  | 94267360  | 94267361  |
| γ-proteobacteria-Aeromonadales                        | <i>Aeromonas caviae</i> Ac98                                          | H Path                 | 334703564                                       | 334703565 | 334703569 | 334703566 | 334703567 | 334703568 |
| γ-proteobacteria-Aeromonadales                        | <i>Aeromonas veronii</i> AMC34                                        | FL non-M, but H/A Path | 423205572                                       | 423205571 | 423205567 | 423205570 | 423205569 | 423205568 |
| γ-proteobacteria-Alteromonadales                      | <i>Alteromonas macleodii</i> str. 'Black Sea 11                       | FL M                   | 407701426                                       | 407701425 | 407701421 | 407701423 | 407701424 | 407701422 |
| γ-proteobacteria-Alteromonadales                      | <i>Marinobacter aquaeolei</i> VT8                                     | FL M                   | 120554848                                       | 120554847 | 120554843 | 120554846 | 120554845 | 120554844 |
| γ-proteobacteria-Alteromonadales                      | <i>Colwellia psychrerythraea</i> 34H                                  | FL M                   | 71279370                                        | 71279883  | 71281144  | 71278488  | 71282119  | 71282541  |
| γ-proteobacteria-Alteromonadales                      | <i>Ferrimonas balearica</i> DSM 9799                                  | M                      | 308048613                                       | 308048614 | 308048618 | 308048615 | 308048616 | 308048617 |
| γ-proteobacteria-Alteromonadales                      | <i>Glaciecola mesophila</i> KMM 241                                   | FL M                   | 410626983                                       | 410626985 | 410626989 | 410626986 | 410626987 | 410626988 |
| γ-proteobacteria-Alteromonadales                      | <i>Idiomarina loihiensis</i> L2TR                                     | FL M Halo              | 56460158                                        | 56460157  | 56460153  | 56460156  | 56460155  | 56460154  |
| γ-proteobacteria-Alteromonadales                      | <i>Marinobacter algicola</i> DG893                                    | Int/Cell/Protist       | 149376581                                       | 149376578 | 149376576 | 149376579 | 149376577 | 149376575 |
| γ-proteobacteria-Alteromonadales                      | <i>Moritella</i> sp. PE36                                             | FL M                   | 149911095                                       | 149911094 | 149911091 | 149911093 | 149911092 | 149911091 |
| γ-proteobacteria-Alteromonadales                      | <i>Pseudalteromonas atlantica</i> T6c                                 | FL M                   | 109896781                                       | 109896782 | 109896786 | 109896783 | 109896784 | 109896785 |
| γ-proteobacteria-Alteromonadales                      | <i>Pseudalteromonas tunicata</i> D2                                   | FL M                   | 88858245                                        | 88858244  | 88858240  | 88858243  | 88858242  | 88858241  |
| γ-proteobacteria-Alteromonadales                      | <i>Psychromonas ingrahamii</i> 37                                     | FL M                   | 119944517                                       | 119944518 | 119944522 | 119944519 | 119944520 | 119944521 |
| γ-proteobacteria-Alteromonadales                      | <i>Psychromonas</i> sp. CNPT3                                         | FL M                   | 470479877                                       | 470479876 | 470479872 | 470479875 | 470479874 | 470479873 |
| γ-proteobacteria-Alteromonadales                      | <i>Saccharophagus degradans</i> 2-40                                  | FL M                   | 90021442                                        | 90021443  | 90021447  | 90021444  | 90021445  | 90021446  |
| γ-proteobacteria-Alteromonadales                      | <i>Shewanella halifaxensis</i> HAW-EB4                                | FL M                   | 167625099                                       | 167625098 | 167625094 | 167625097 | 167625096 | 167625095 |
| γ-proteobacteria-Alteromonadales                      | <i>Shewanella woodyi</i> ATCC 51908                                   | M                      | 170727950                                       | 170727949 | 170727945 | 170727948 | 170727947 | 170727946 |
| γ-proteobacteria-Alteromonadales                      | <i>Teredinibacter turnerae</i> T901                                   | M                      | 254786006                                       | 254786007 | 254786011 | 254786008 | 254786009 | 254786010 |
| γ-proteobacteria-Enterobacteriales                    | <i>Arsephenonax nasomiae</i>                                          | A Path                 | 284007777                                       | 284007776 | 284007772 | 284007775 | 284007774 | 284007773 |
| γ-proteobacteria-Enterobacteriales                    | <i>Enterobacteriaceae bacterium</i> strain FGI 57                     | FL non-M               | 440288960                                       | 440288959 | 440288955 | 440288958 | 440288957 | 440288956 |
| γ-proteobacteria-Enterobacteriales                    | <i>Escherichia blattae</i> DSM 4481                                   | A Path                 | 387890413                                       | 387890412 | 387890408 | 387890411 | 387890410 | 387890409 |
| γ-proteobacteria-Enterobacteriales                    | <i>Klebsiella pneumoniae</i> subsp. <i>pneumoniae</i> MGH 78578       | H/A Path               | 152968813                                       | 152968814 | 152968818 | 152968815 | 152968816 | 152968817 |
| γ-proteobacteria-Enterobacteriales                    | <i>Photobacterium asymmetricum</i>                                    | H Path                 | 253990731                                       | 253990730 | 253990726 | 253990729 | 253990728 | 253990727 |
| γ-proteobacteria-Enterobacteriales                    | <i>Serratia proteomaculans</i> 568                                    | Int/Cell/Protist       | 157369198                                       | 157369199 | 157369203 | 157369200 | 157369201 | 157369202 |
| γ-proteobacteria-Enterobacteriales                    | <i>Yersinia pestis</i> KIM10+                                         | H Path                 | 22124858                                        | 22124859  | 22124863  | 22124860  | 22124861  | 22124862  |
| γ-proteobacteria-Enterobacteriales                    | <i>Yersinia pseudotuberculosis</i> YPIII                              | H Path                 | 170025522                                       | 170025521 | 170025517 | 170025520 | 170025519 | 170025518 |
| γ-proteobacteria-Methylocooccales                     | <i>Methylococcum alcaliphilum</i> 20Z                                 | FL non-M Halo          | 357405587                                       | 357405586 | 357405582 | 357405585 | 357405584 | 357405583 |
| γ-proteobacteria-Methylocooccales                     | <i>Methylococcus capsulatus</i> str. Bath                             | FL non-M               | 53803505                                        | 53803506  | 53803519  | 53803507  | 53803508  | 53803509  |
| γ-proteobacteria-Oceanospirillales                    | <i>Alcanivorax borkumensis</i> SK2                                    | FL M                   | 110833893                                       | 110833894 | 110833898 | 110833895 | 110833896 | 110833897 |
| γ-proteobacteria-Oceanospirillales                    | <i>Bermanella marisrubri</i>                                          | FL M                   | 94499514                                        | 94499515  | 94499519  | 94499516  | 94499517  | 94499518  |
| γ-proteobacteria-Oceanospirillales                    | <i>Chromohalobacter salexigenis</i> DSM 3043                          | FL M Halo              | 92113693                                        | 92113694  | 92113698  | 92113695  | 92113696  | 92113697  |
| γ-proteobacteria-Oceanospirillales                    | <i>Hahella chejuensis</i> KCTC 2396                                   | FL M                   | 83645463                                        | 83645464  | 83645468  | 83645465  | 83645466  | 83645467  |
| γ-proteobacteria-Oceanospirillales                    | <i>Halomonas boliviensis</i> LC1                                      | FL non-M Halo          | 359395291                                       | 359395290 | 359395286 | 359395289 | 359395288 | 359395287 |
| γ-proteobacteria-Oceanospirillales                    | <i>Marinomonas mediterranea</i> MMB-1                                 | FL M                   | 326546602                                       | 326546601 | 326546597 | 326546600 | 326546599 | 326546598 |
| γ-proteobacteria-Oceanospirillales                    | <i>Marinomonas</i> sp. MWL1                                           | FL M Halo              | 152995737                                       | 152995738 | 152995742 | 152995739 | 152995740 | 152995741 |
| γ-proteobacteria-Oceanospirillales                    | <i>Neptanibacter caecoriensis</i>                                     | FL M                   | 80994302                                        | 80994303  | 80994307  | 80994304  | 80994305  | 80994306  |
| γ-proteobacteria-Pasteurellales                       | <i>Aerogathibacter actinomycetomimans</i> D75-1                       | H/A Path               | 293390921                                       | 293390920 | 293390916 | 293390919 | 293390918 | 293390917 |
| γ-proteobacteria-Pasteurellales                       | <i>Haemophilus influenzae</i> 86-O2NHP                                | H Path                 | 68248771                                        | 68248772  | 68248776  | 68248773  | 68248774  | 68248775  |
| γ-proteobacteria-Pasteurellales                       | <i>Pasteurella multocida</i> subsp. <i>multocida</i> str. Pn70        | H Path                 | 15603193                                        | 15603194  | 15603198  | 15603195  | 15603196  | 15603197  |
| γ-proteobacteria-Pseudomonadales                      | <i>Cellvibrio japonicus</i> Ueda107                                   | FL non-M               | 192359833                                       | 192359833 | 190685590 | 192362189 | 192361593 | 192361014 |
| γ-proteobacteria-Pseudomonadales                      | <i>Moraxella catarrhalis</i> BC1                                      | H Path                 | 416237647                                       | 416237648 | 416237652 | 416237649 | 416237650 | 416237651 |
| γ-proteobacteria-Pseudomonadales                      | <i>Pseudomonas aeruginosa</i> PAO1                                    | H Path                 | 15598195                                        | 15598194  | 15598190  | 15598193  | 15598192  | 15598191  |
| γ-proteobacteria-Pseudomonadales                      | <i>Pseudomonas pseudoalcaligenes</i> KF707                            | FL non-M               | 443472679                                       | 443472678 | 443472674 | 443472677 | 443472676 | 443472675 |
| γ-proteobacteria-Pseudomonadales                      | <i>Psychrobacter cryohalotolerans</i> K5                              | FL M                   | 93007248                                        | 93007249  | 93007253  | 93007250  | 93007251  | 93007252  |
| γ-proteobacteria-Pseudomonadales                      | <i>Psychrobacter</i> sp. PrWf-1                                       | M                      | 148651917                                       | 148651916 | 148651912 | 148651915 | 148651914 | 148651913 |
| γ-proteobacteria-Thiotrichales                        | <i>Cycloclasticus</i> sp. P1                                          | FL M                   | 407715786                                       | 407715787 | 407715791 | 407715788 | 407715789 | 407715790 |
| γ-proteobacteria-Thiotrichales                        | <i>Methylophaga</i> sp. JAM1                                          | FL M                   | 387128366                                       | 387128367 | 387128371 | 387128368 | 387128369 | 387128370 |
| γ-proteobacteria-Vibrionales                          | <i>Photobacterium leionathi</i> subsp. <i>mandapamensis</i> svers.1.1 | FL M                   | 330445290                                       | 330445291 | 330445295 | 330445292 | 330445293 | 330445294 |
| γ-proteobacteria-Vibrionales                          | <i>Vibrio cholerae</i> O1 <i>bivovar</i> El Tor str. N16961           | M/H Path               | 15642293                                        | 15642292  | 15642288  | 15642291  | 15642290  | 15642289  |
| Bacteroidetes-Chlorobi-Bacteroidetes                  | <i>Korarchaeum</i> sp. 2-1_33B                                        | FL M                   | 163755680                                       | 163755681 | 163755685 | 163755682 | 163755683 | 163755684 |
| Bacteroidetes-Chlorobi-Bacteroidetes                  | <i>Mesofillibacter zeaxanthinifaciens</i> S86                         | FL M                   | 372222847                                       | 372222848 | 372222852 | 372222849 | 372222850 | 372222851 |
| Bacteroidetes-Chlorobi-Bacteroidetes                  | <i>Anaerophaga thermohalophila</i> DSM 12881                          | FL non-M               | 346224054                                       | 346224055 | 346224059 | 346224056 | 346224057 | 346224058 |
| Bacteroidetes-Chlorobi-Bacteroidetes                  | <i>Bacteroides</i> sp. 2_1_33B                                        | H mic                  | 262381724                                       | 262381725 | 262381729 | 262381726 | 262381727 | 262381728 |
| Bacteroidetes-Chlorobi-Bacteroidetes                  | <i>Bacteroides fragilis</i> YCH46                                     | H/A Path               | 60681549                                        | 53713301  | 53713305  | 53713302  | 53713303  | 53713304  |
| Bacteroidetes-Chlorobi-Bacteroidetes                  | <i>Tannerella</i> sp. 6_1_58FAA_CT1                                   | H Path                 | 365122080                                       | 365122081 | 365122085 | 365122082 | 365122083 | 365122084 |
| Bacteroidetes-Chlorobi-Bacteroidetes                  | <i>Porphyromonas gingivalis</i> ATCC 33277                            | H Path                 | 188993978                                       | 188993979 | 188993983 | 188993980 | 188993981 | 188993982 |
| Bacteroidetes-Chlorobi-Chlorobi                       | <i>Chlorobium phaeoacidovorans</i> BS1                                | FL non-M               | 189501294                                       | 189501293 | 189501289 | 189501292 | 189501291 | 189501290 |
| Bacteroidetes-Chlorobi-Chlorobi                       | <i>Prosthecochloris aestuarii</i> DSM 271                             | FL M                   | 194334929                                       | 194334928 | 194334924 | 194334927 | 194334926 | 194334925 |
| Chlamydiae-Chlamydia-Chlamydiales                     | <i>Chlamydia caviae</i> GPIC                                          | A Path                 | 29839771                                        | 29840129  | 29840642  | 29840128  | 29840127  | 29840126  |
| Chlamydiae-Chlamydia-Chlamydiales                     | <i>Waddlia chondrophila</i> WSU 86-1044                               | A Path                 | 297622124                                       | 297620514 | 297620460 | 297620513 | 297620512 | 297620511 |
| Chlamydiae-Chlamydia-Chlamydiales                     | <i>Candidatus Protochlamydia amoebophila</i> UWE25                    | H Path                 | 46445729                                        | 46445935  | 46447167  | 46445934  | 46445933  | 46445932  |
| Chlamydiae-Chlamydia-Chlamydiales                     | <i>Chlamydia trachomatis</i> D-EC                                     | H Path                 | 297748764                                       | 297748407 | 297748871 | 297748408 | 297748409 | 297748410 |
| Chlamydiae-Chlamydia-Chlamydiales                     | <i>Chlamydia pneumoniae</i> CWL029                                    | H Path                 | 15618653                                        | 15618342  | 15618792  | 15618343  | 15618344  | 15618345  |
| Chlamydiae-Chlamydia-Chlamydiales                     | <i>Sinkania negevensis</i> Z                                          | H Path                 | 336483587                                       | 33873270  | 338732292 | 338732369 | 338732368 | 338732367 |
| Chlamydiae-Chlamydia-Chlamydiales                     | <i>Chlamydia muridarum</i> Nigg5                                      | H/A Path               | 15834627                                        | 15835168  | 15834741  | 15835169  | 15835170  | 15835171  |
| Chlamydiae-Chlamydia-Chlamydiales                     | <i>Parachlamydia acanthonoeboae</i> str. Hall's coccus                | Int/Cell/Protist       | 282890124                                       | 282891904 | 282892090 | 282891905 | 282891906 |           |
